# Supplementary material for: Naphthyl bearing 1,3,4-thiadiazoleacetamides targeting the parasitic folate pathway as anti-infectious agents: in silico, synthesis, and biological approach
Source: Royal Society of Chemistry journal article supplement (doi:10.1039/d3md00423f), 2023-01-01
Supplement: d3md00423f1.pdf [file d3md00423f1.pdf]

## **Naphthyl bearing 1,3,4-thiadiazoleacetamides targeting Parasitic Folate Pathway as Anti-Infectious Agents: *In-silico*, Synthesis, and Biological Approach**

**Kavita Pal<sup>1</sup>, Sahil Lala<sup>2,3</sup>, Priyanka Agarwal<sup>2,3</sup>, Tarosh S. Patel<sup>4</sup>, Jenny Legac<sup>5</sup>, Md. Ataur Rahman<sup>6</sup>, Saiema Ahmedi<sup>7</sup>, Nida Shahid<sup>8</sup>, Sneha Singh<sup>9</sup>, Kajal kumari<sup>9</sup>, Hari Madhav<sup>1</sup>, Abhik Sen<sup>9</sup>, Nikhat Manzoor<sup>7</sup>, Bharat C. Dixit<sup>4</sup>, Robyn Van Zyl<sup>2,3</sup>, Philip J. Rosenthal<sup>5</sup>, Nasimul Hoda<sup>1\*</sup>**

<sup>1</sup>*Drug Design and Synthesis Laboratory, Department of chemistry, Jamia Millia Islamia, New Delhi 110025, India*

<sup>2</sup>*Pharmacology Division, Department of Pharmacy and Pharmacology, School of Therapeutic Sciences, Faculty of Health Sciences, University of Witwatersrand, South Africa*

<sup>3</sup>*Wits Institute for Research Malaria (WRIM), Faculty of Health Sciences, University of Witwatersrand, South Africa*

<sup>4</sup>*Chemistry Department, V. P. & R. P. T. P Science College, Affiliated to Sardar Patel University, Vallabh Vidyanagar, 388 120, Gujarat, India*

<sup>5</sup>*Department of Medicine, University of California, San Francisco, CA, USA*

<sup>6</sup>*Chemistry Program, New York University Abu Dhabi (NYUAD), Saadiyat Island, Abu Dhabi, United Arab Emirates (UAE)*

<sup>7</sup>*Medical Mycology Lab, Department of Biosciences, Jamia Millia Islamia, New Delhi, 110025, India*

<sup>8</sup>*Department of Chemistry, Jamia Millia Islamia, New Delhi, India*

<sup>9</sup>*Department of Molecular Biology, ICMR- Rajendra Memorial Research Institute of Medical Sciences, Bihar, India*

## **Table of Contents**

**Figure S1.**  $^1\text{H}$  NMR spectra of compound **T1**

**Figure S2.**  $^{13}\text{C}$  NMR spectra of compound **T1**

**Figure S3.** Mass spectra of compound **T1**

**Figure S4.**  $^1\text{H}$  NMR spectra of compound **T2**

**Figure S5.**  $^{13}\text{C}$  NMR spectra of compound **T2**

**Figure S6.** Mass spectra of compound **T2**

**Figure S7.**  $^1\text{H}$  NMR spectra of compound **T3**

**Figure S8.**  $^{13}\text{C}$  NMR spectra of compound **T3**

**Figure S9.** Mass spectra of compound **T3**

**Figure S10.**  $^1\text{H}$  NMR spectra of compound **T4**

**Figure S11.**  $^{13}\text{C}$  NMR spectra of compound **T4**

**Figure S12.** Mass spectra of compound **T4**

**Figure S13.**  $^1\text{H}$  NMR spectra of compound **T5**

**Figure S14.**  $^{13}\text{C}$  NMR spectra of compound **T5**

**Figure S15.** Mass spectra of compound **T5**

**Figure S16.**  $^1\text{H}$  NMR spectra of compound **T6**

**Figure S17.**  $^{13}\text{C}$  NMR spectra of compound **T6**

**Figure S18.** Mass spectra of compound **T6**

**Figure S19.**  $^1\text{H}$  NMR spectra of compound **T7**

**Figure S20.**  $^{13}\text{C}$  NMR spectra of compound **T7**

**Figure S21.** Mass spectra of compound **T7**

**Figure S22.**  $^1\text{H}$  NMR spectra of compound **T8**

**Figure S23.**  $^{13}\text{C}$  NMR spectra of compound **T8**

**Figure S24.** Mass spectra of compound **T8**

**Figure S25.**  $^1\text{H}$  NMR spectra of compound **T9**

**Figure S26.**  $^{13}\text{C}$  NMR spectra of compound **T9**

**Figure S27.** Mass spectra of compound **T9**

**Figure S28.**  $^1\text{H}$  NMR spectra of compound **T10**

**Figure S29.**  $^{13}\text{C}$  NMR spectra of compound **T10**

**Figure S30.** Mass spectra of compound **T10**

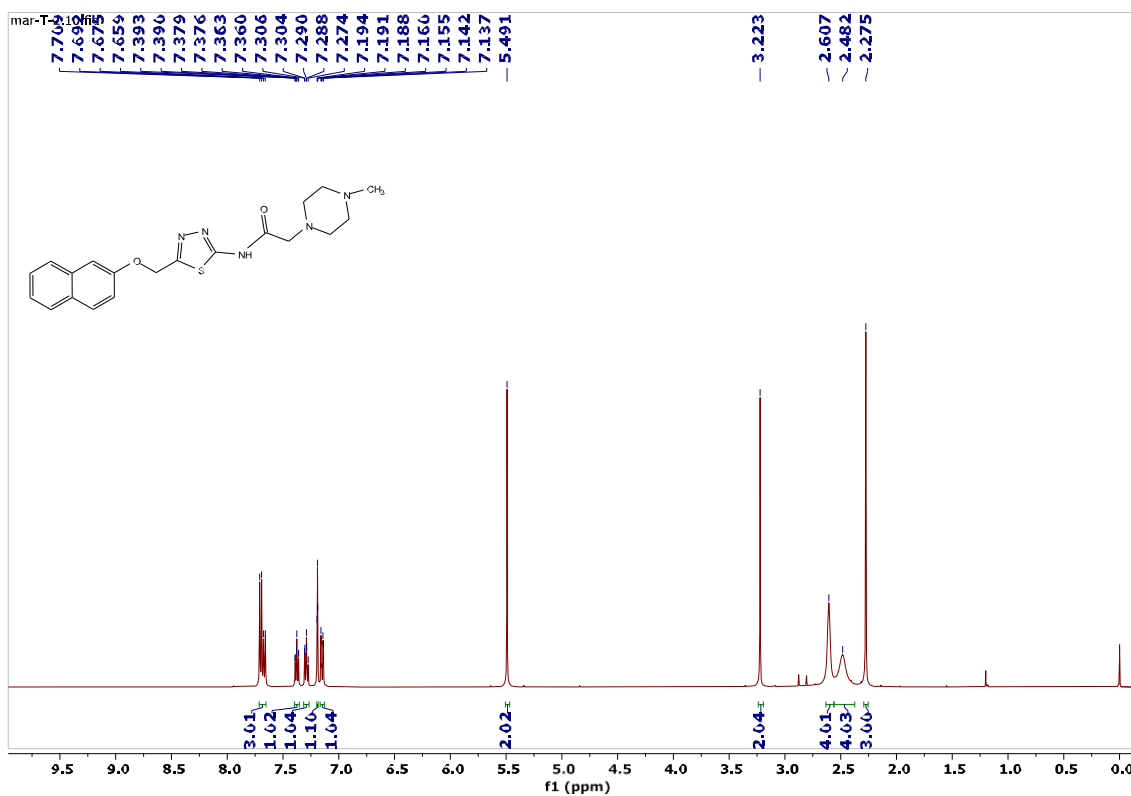

Figure S1. <sup>1</sup>H NMR spectra of compound T1 in CDCl<sub>3</sub>.

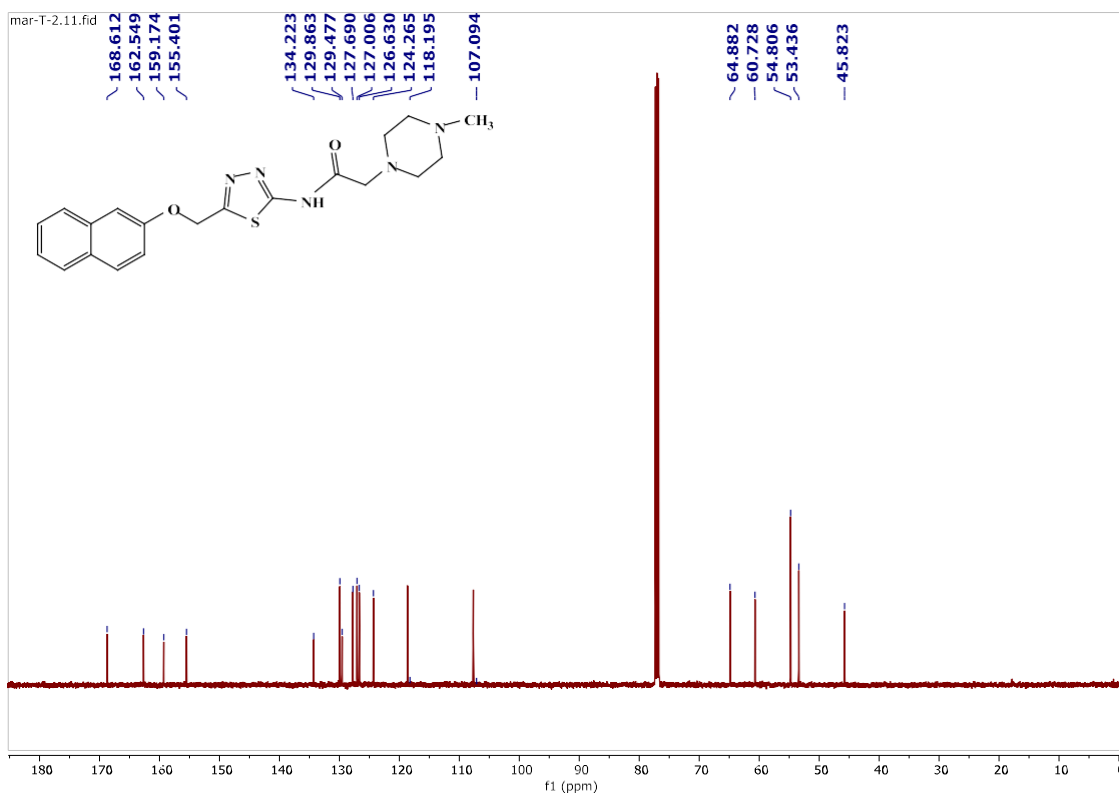

Figure S2. <sup>13</sup>C NMR spectra of compound T1 in CDCl<sub>3</sub>.

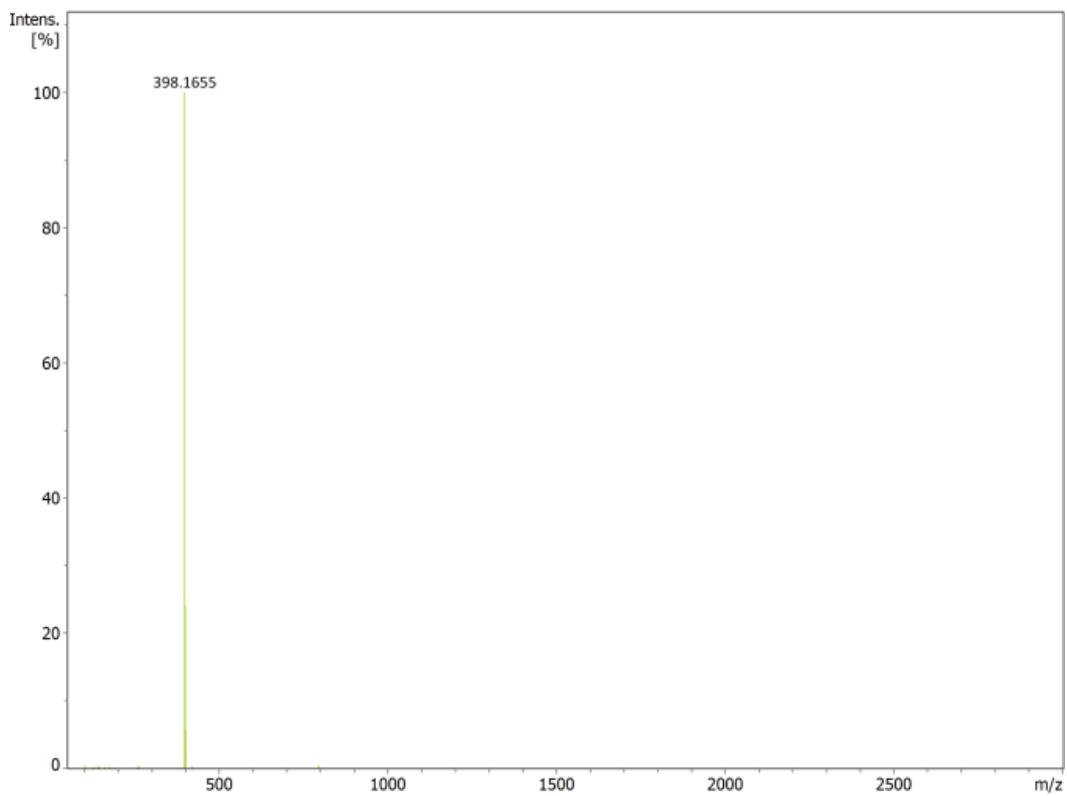

**Figure S3.** Mass spectra of compound T1

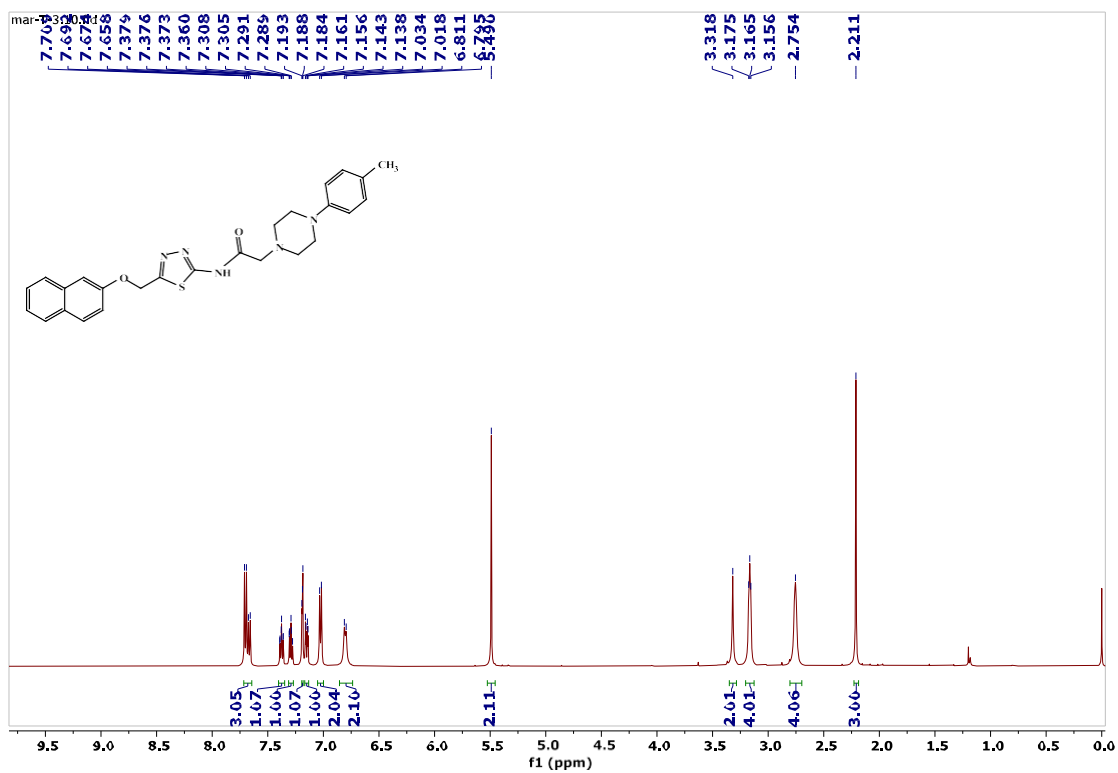

**Figure S4.** <sup>1</sup>H NMR spectra of compound T2 in CDCl<sub>3</sub>.

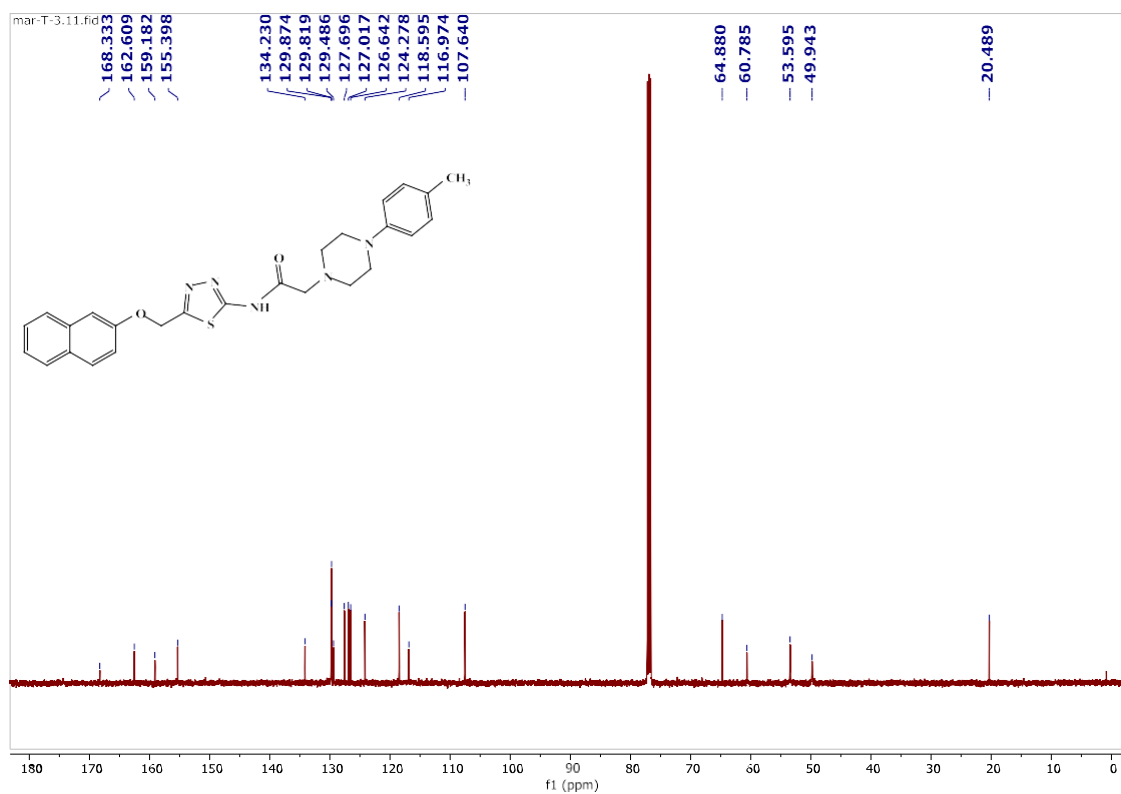

**Figure S5.**  $^{13}\text{C}$  NMR spectra of compound T2 in  $\text{CDCl}_3$ .

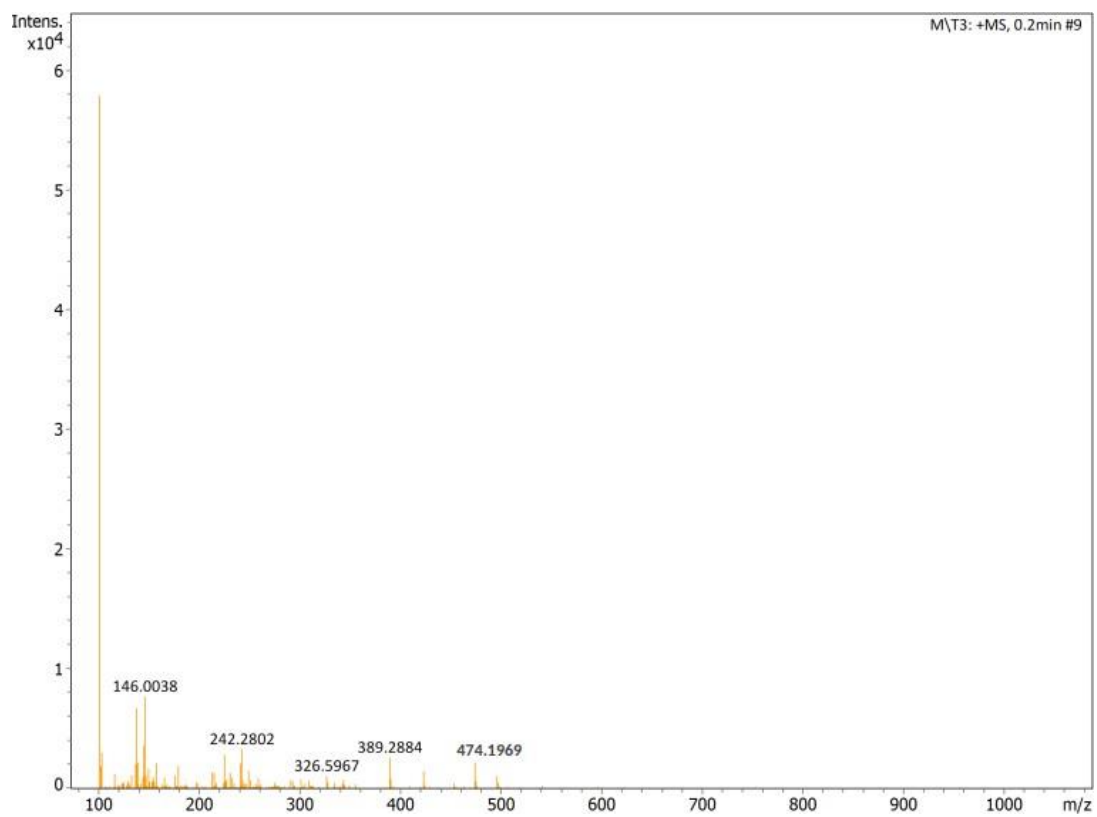

**Figure S6.** Mass spectra of compound T2

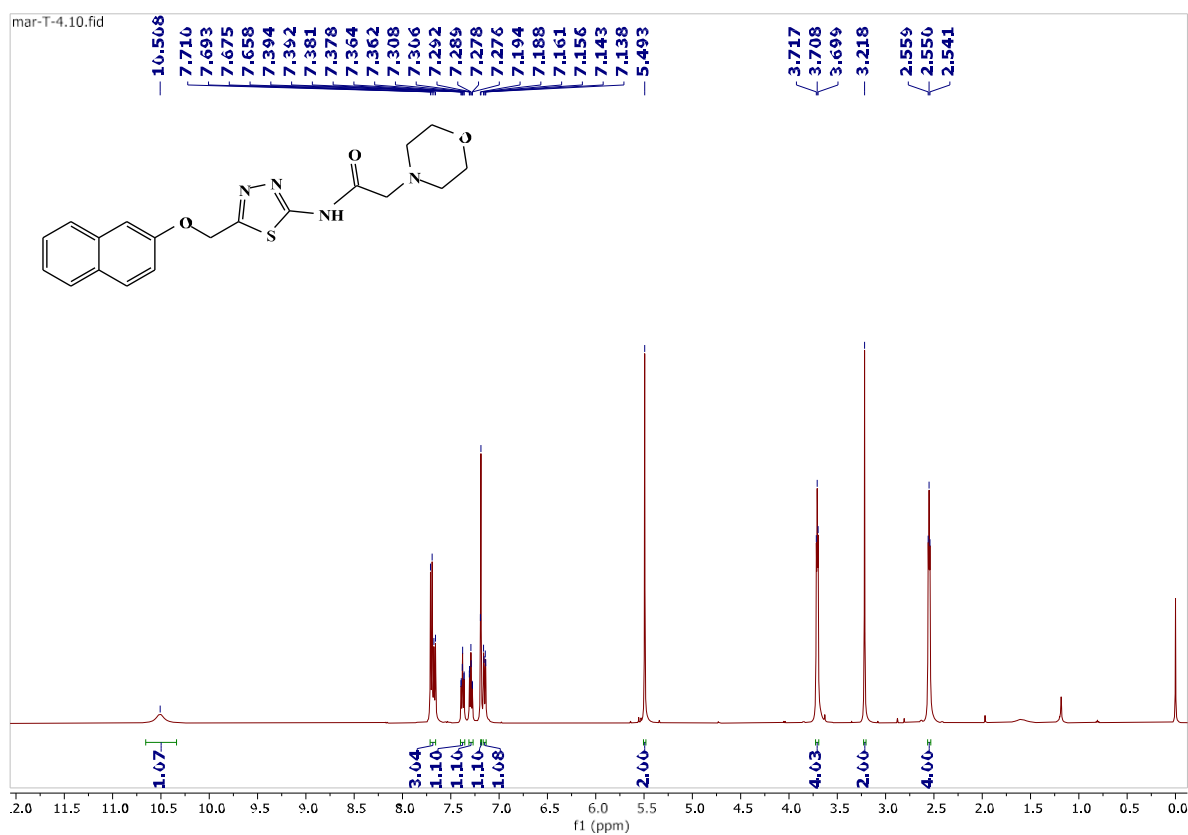

Figure S7.  $^1\text{H}$  NMR spectra of compound T3 in  $\text{CDCl}_3$ .

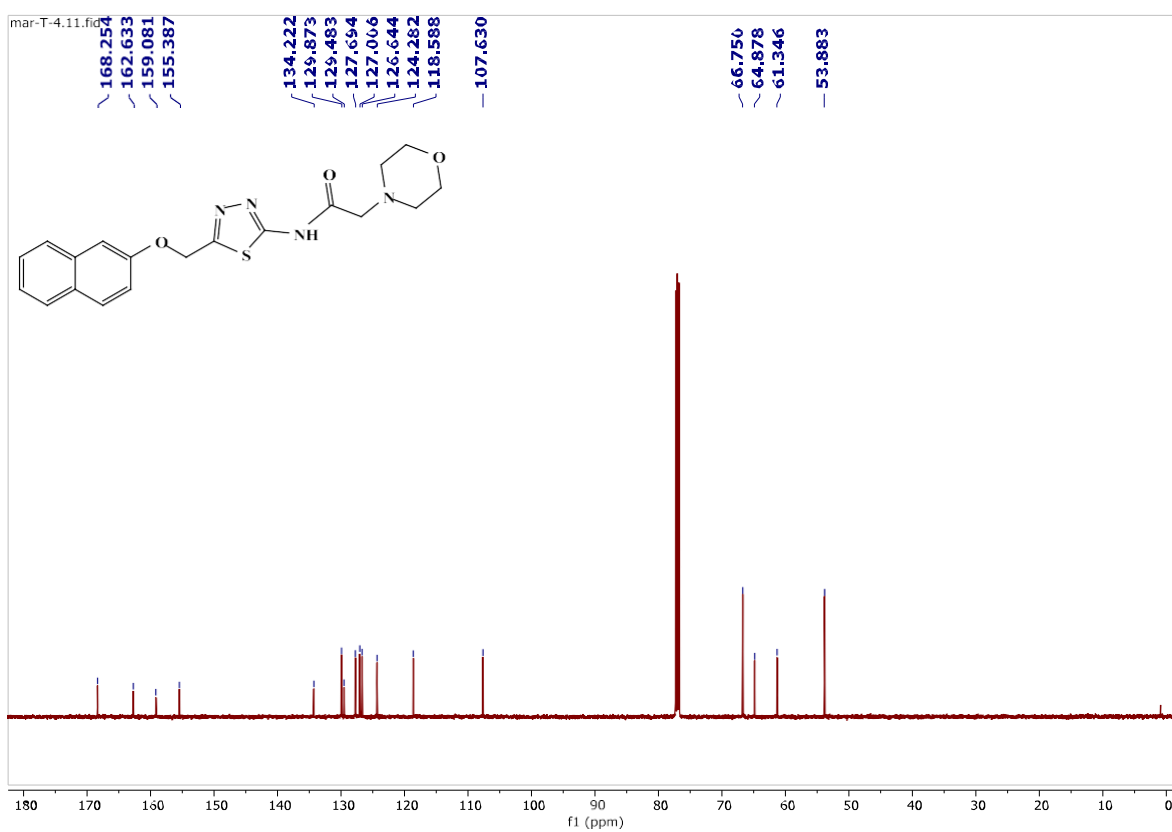

Figure S8.  $^{13}\text{C}$  NMR spectra of compound T3 in  $\text{CDCl}_3$ .

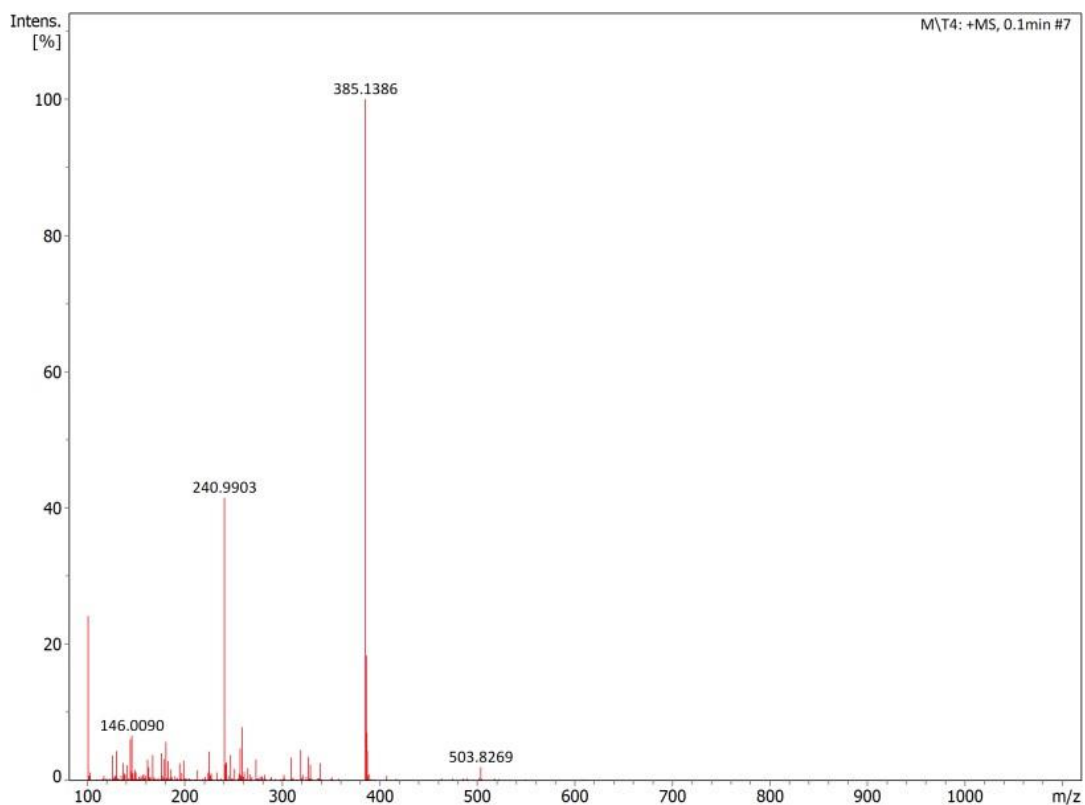

**Figure S9.** Mass spectra of compound **T3**

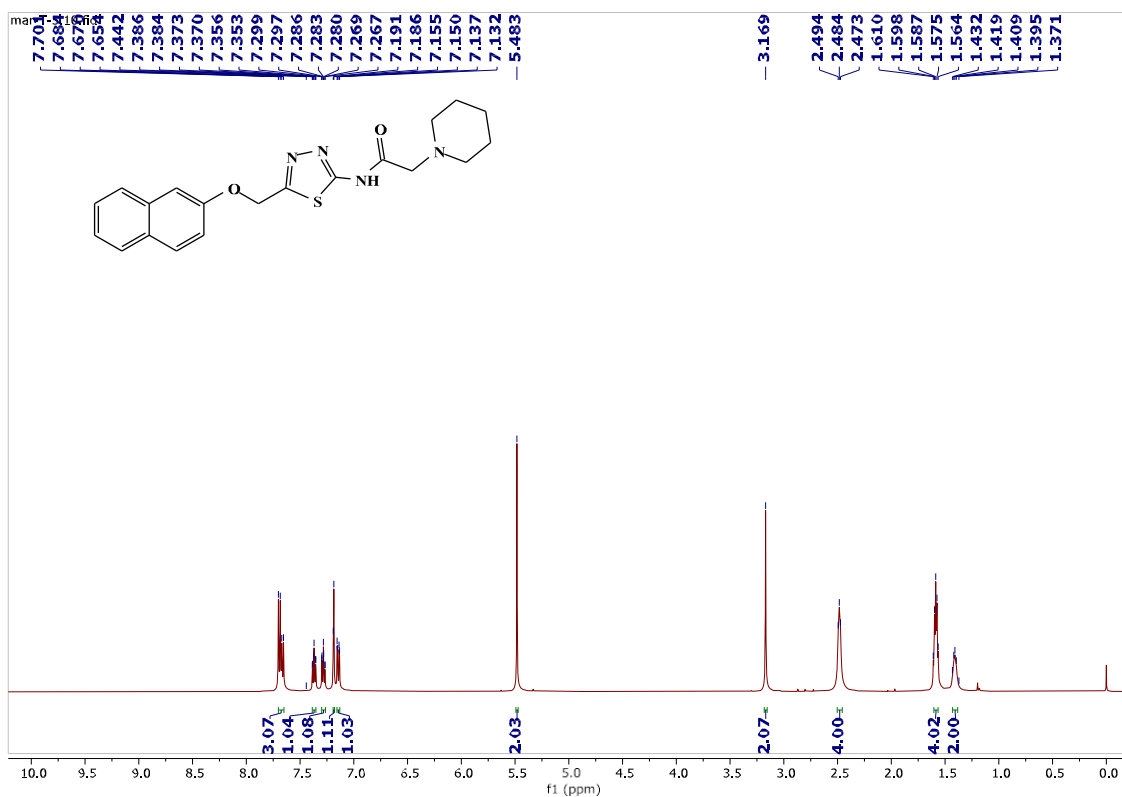

**Figure S10.** <sup>1</sup>H NMR spectra of compound **T4** in CDCl<sub>3</sub>.



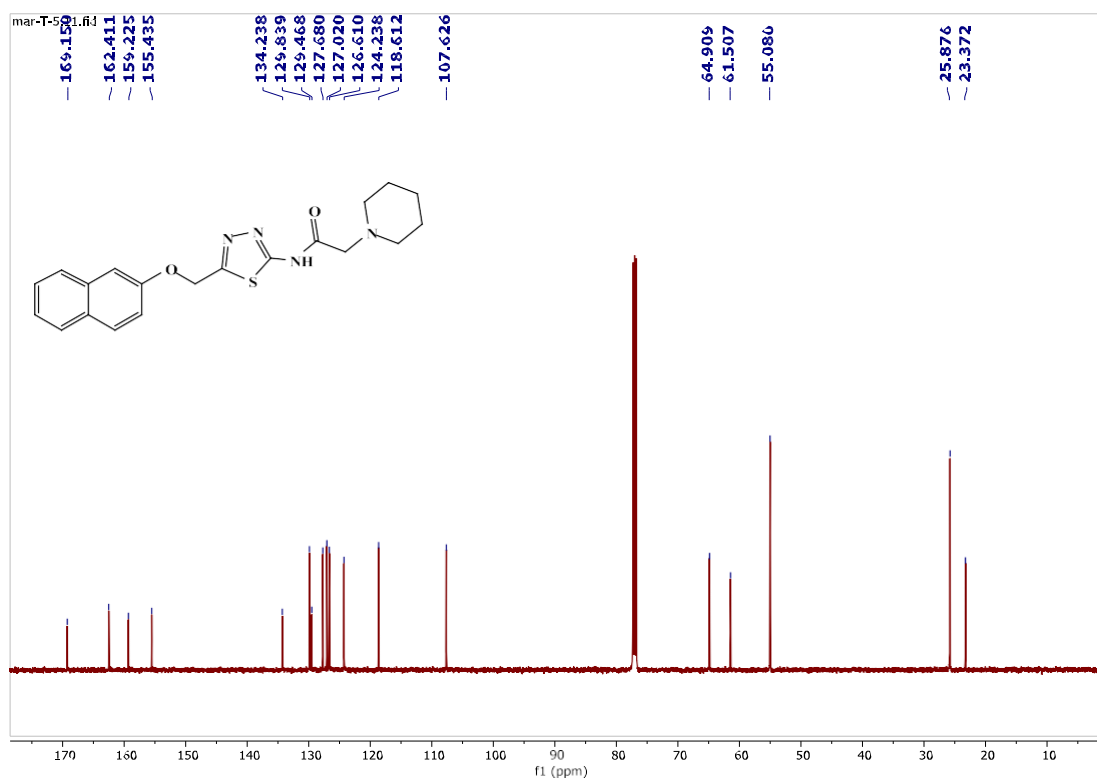

**Figure S11.**  $^{13}\text{C}$  NMR spectra of compound T4 in  $\text{CDCl}_3$ .

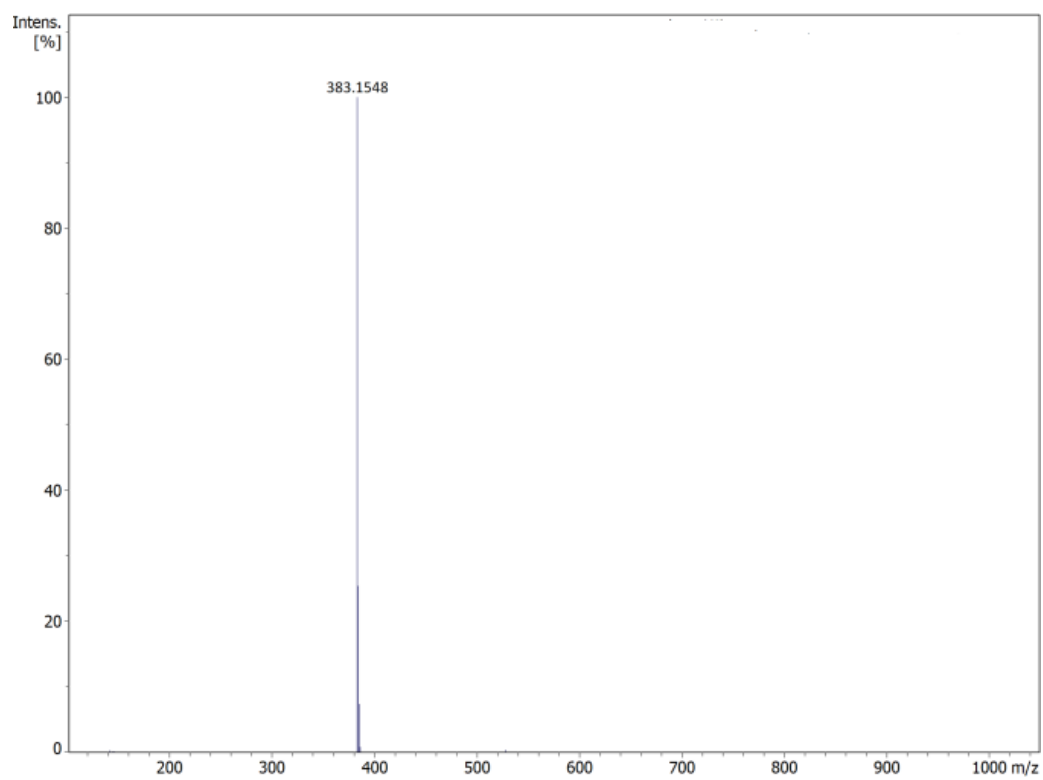

**Figure S12.** Mass spectra of compound T4

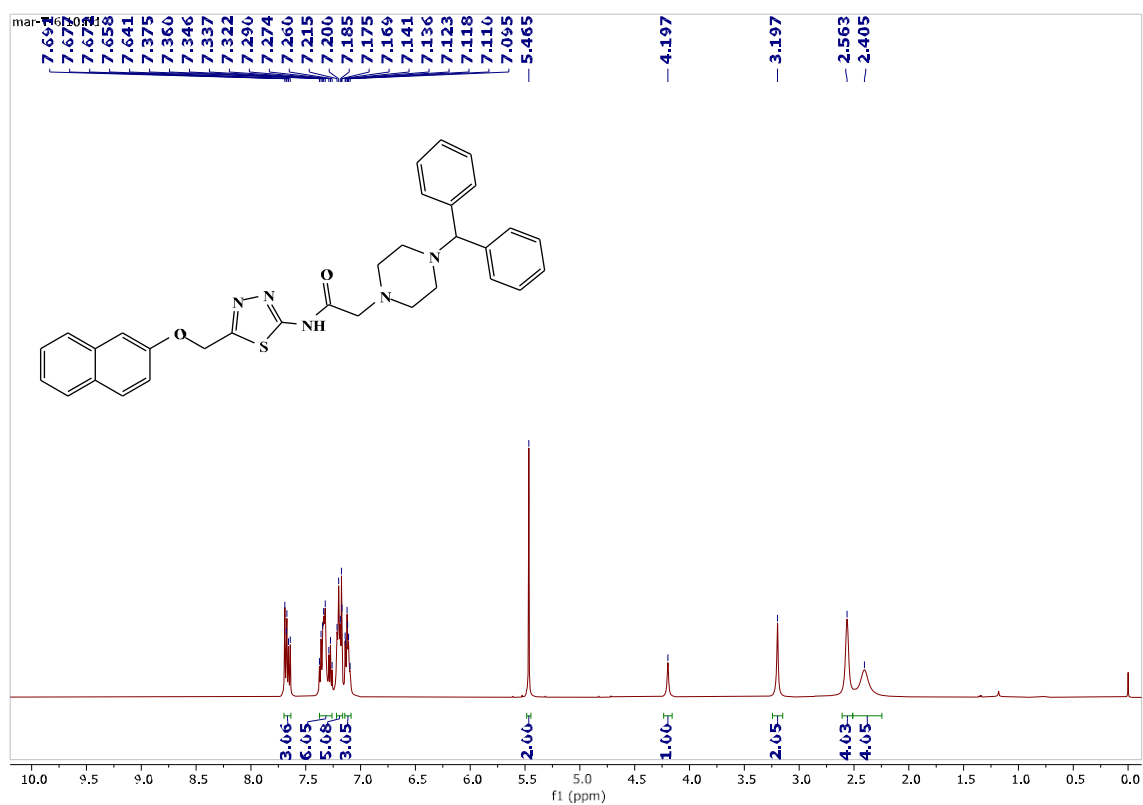

Figure S13. <sup>1</sup>H NMR spectra of compound T5 in CDCl<sub>3</sub>.

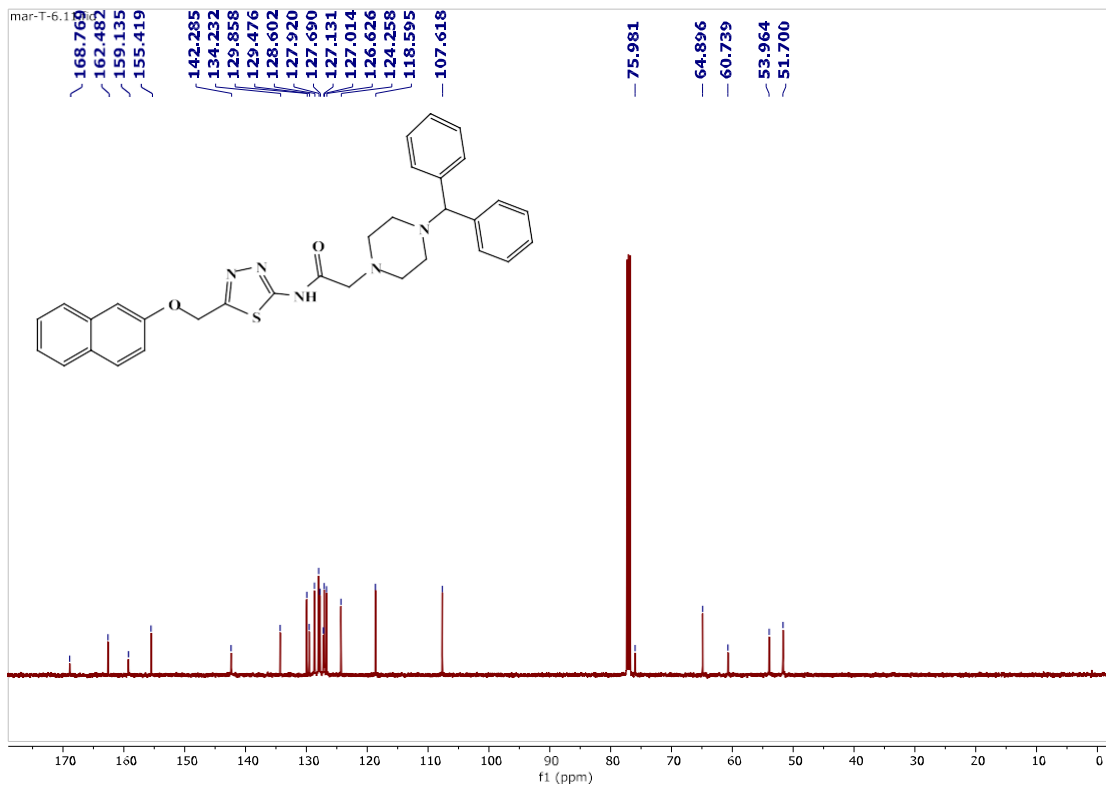

Figure S14. <sup>13</sup>C NMR spectra of compound T5 in CDCl<sub>3</sub>.

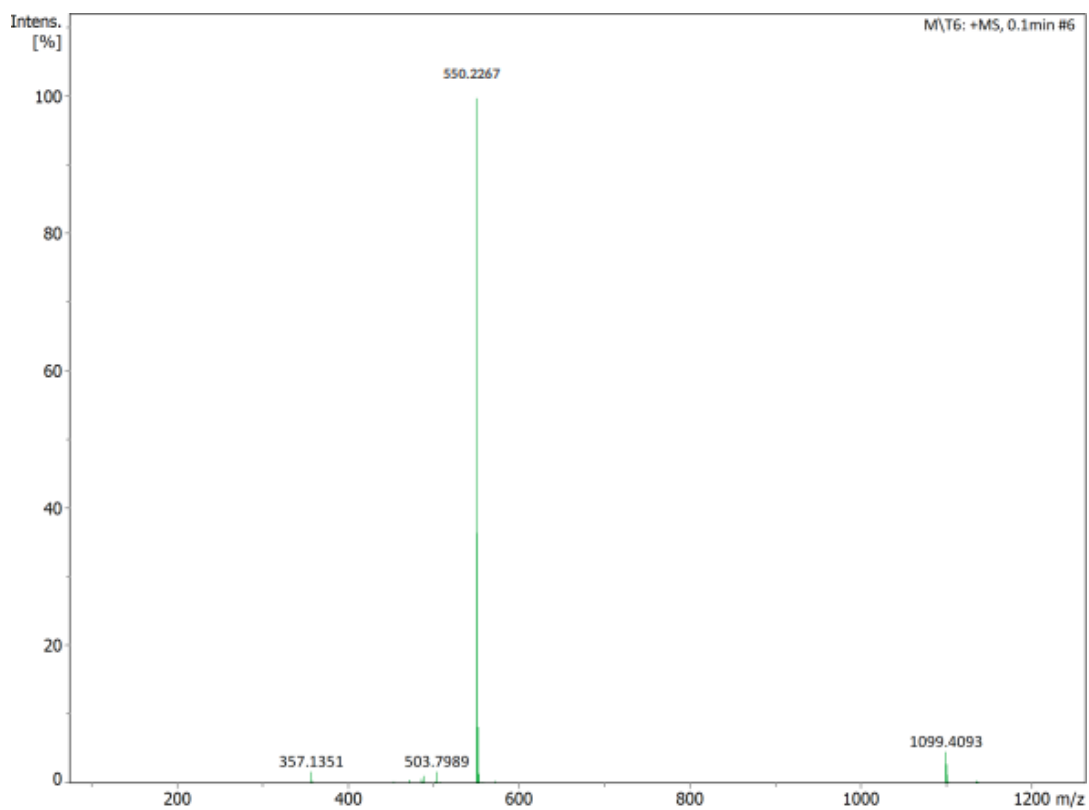

**Figure S15.** Mass spectra of compound T5

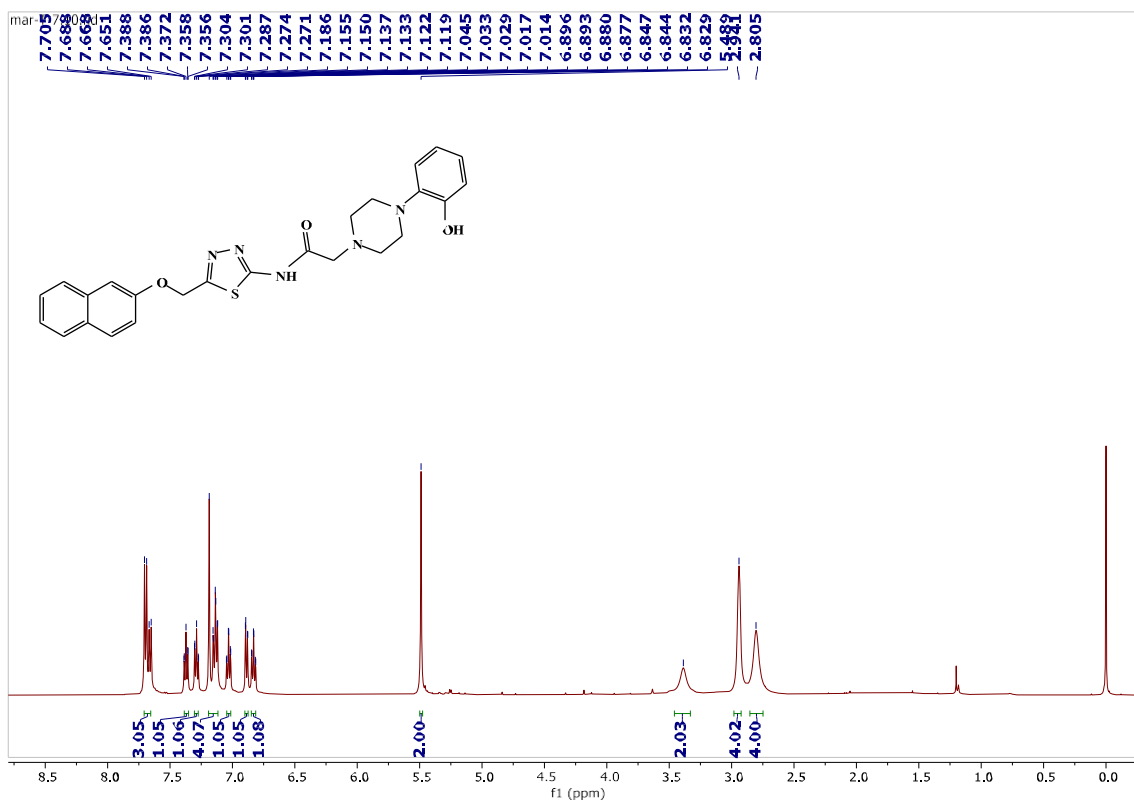

**Figure S16.** <sup>1</sup>H NMR spectra of compound T6 in CDCl<sub>3</sub>.

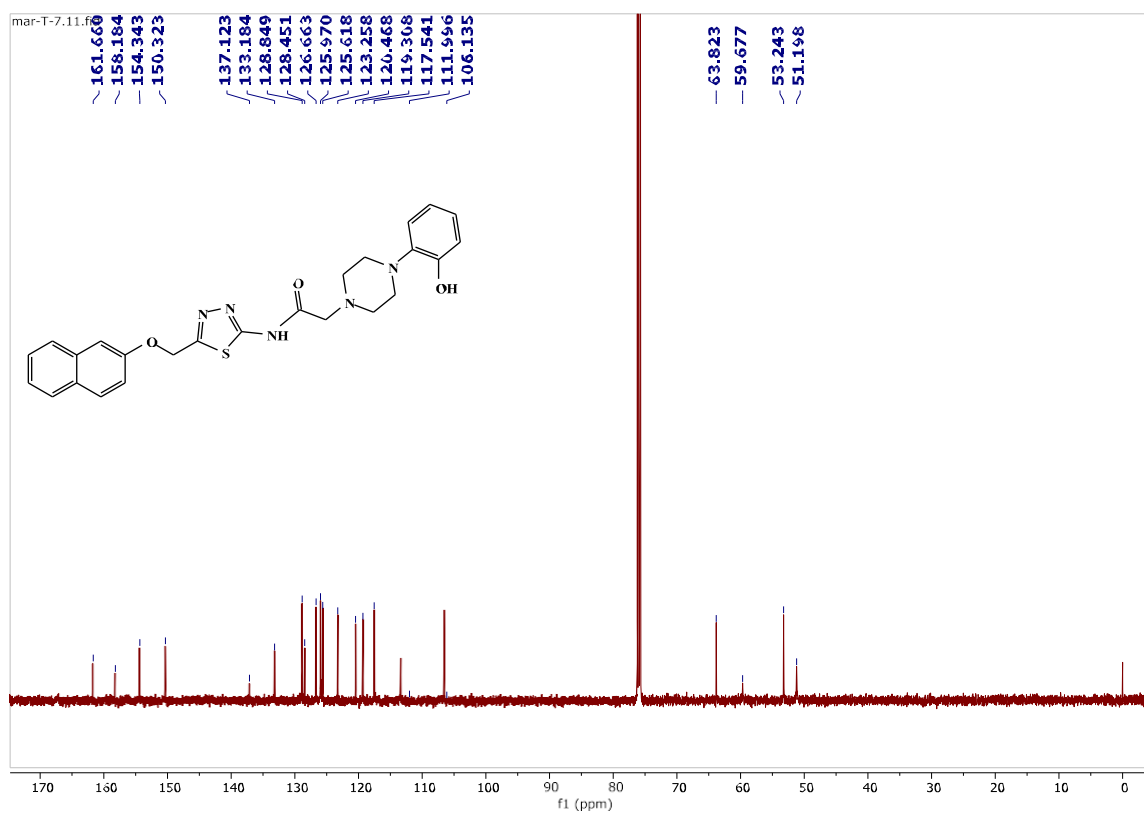

**Figure S17.** <sup>13</sup>C NMR spectra of compound T6 in CDCl<sub>3</sub>.

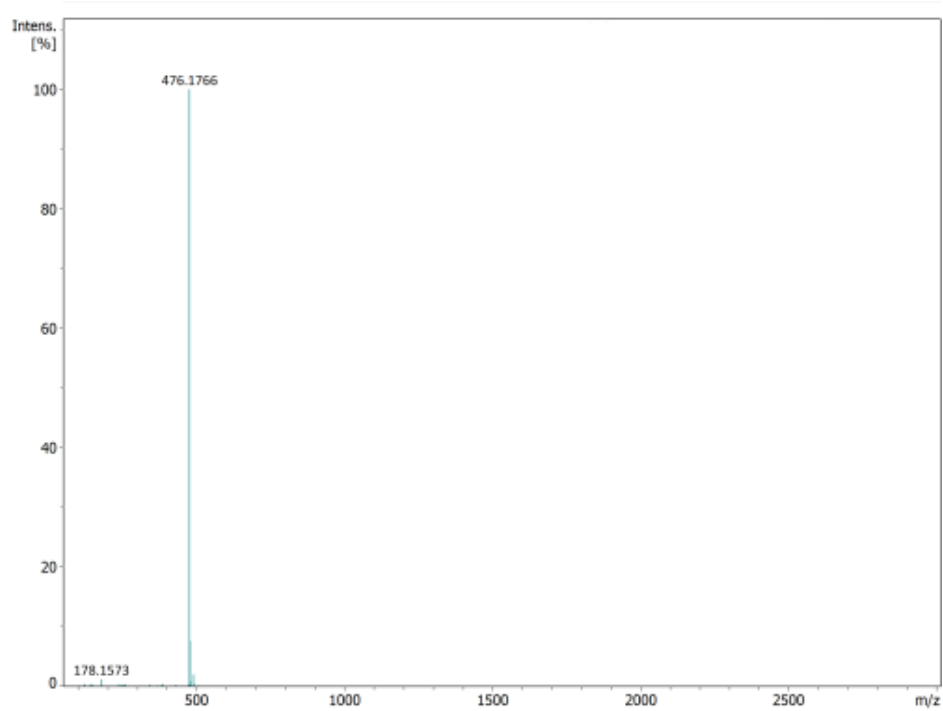

**Figure S18.** Mass spectra of compound T6

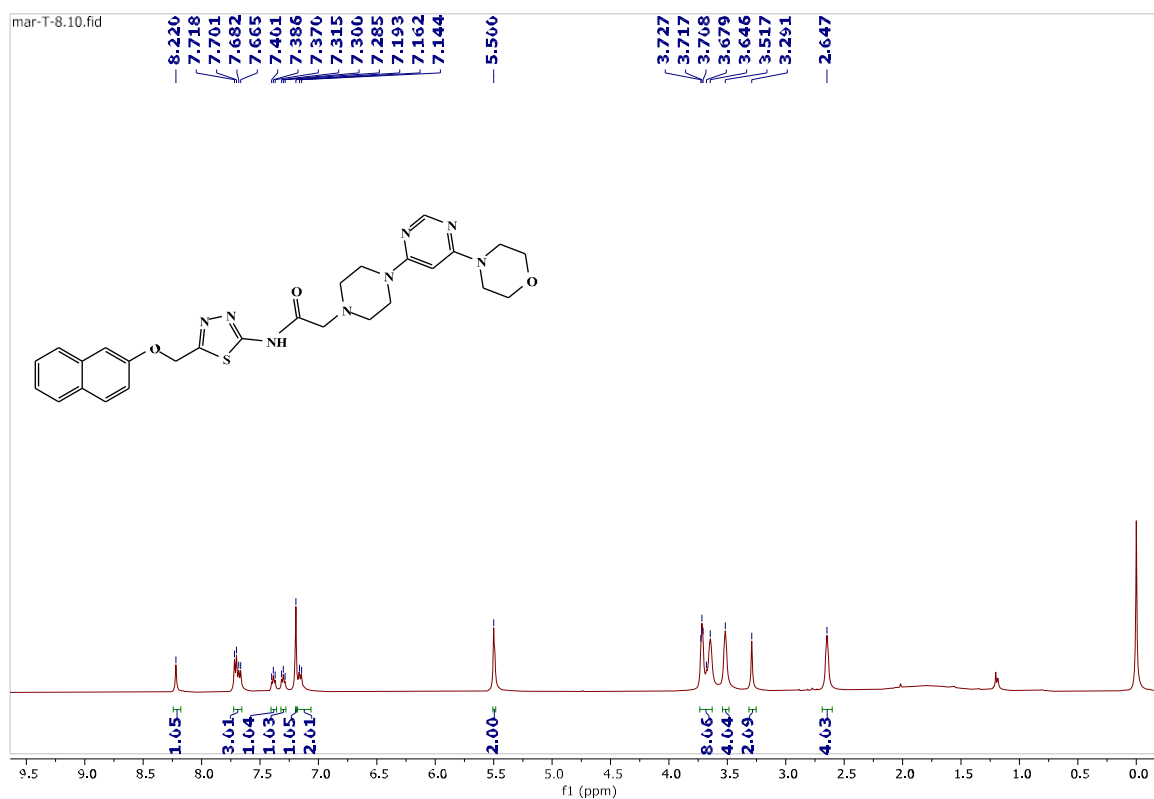

Figure S19.  $^1\text{H}$  NMR spectra of compound T7 in  $\text{CDCl}_3$ .

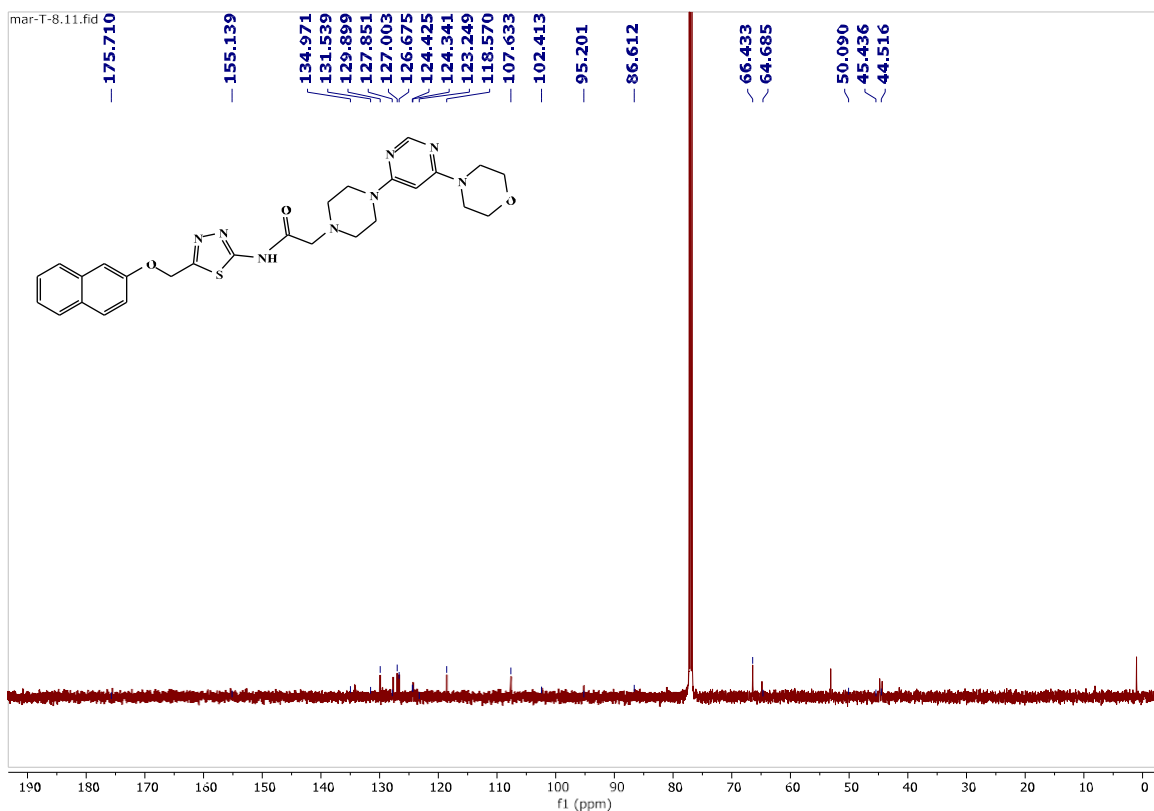

Figure S20.  $^{13}\text{C}$  NMR spectra of compound T7 in  $\text{CDCl}_3$ .

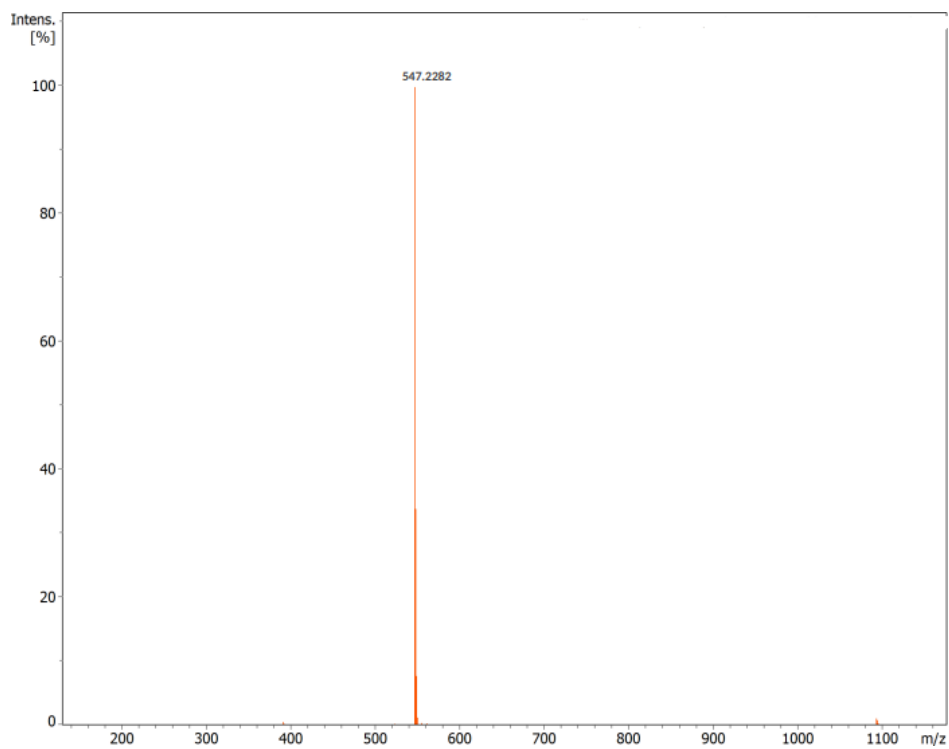

**Figure S21.** Mass spectra of compound T7

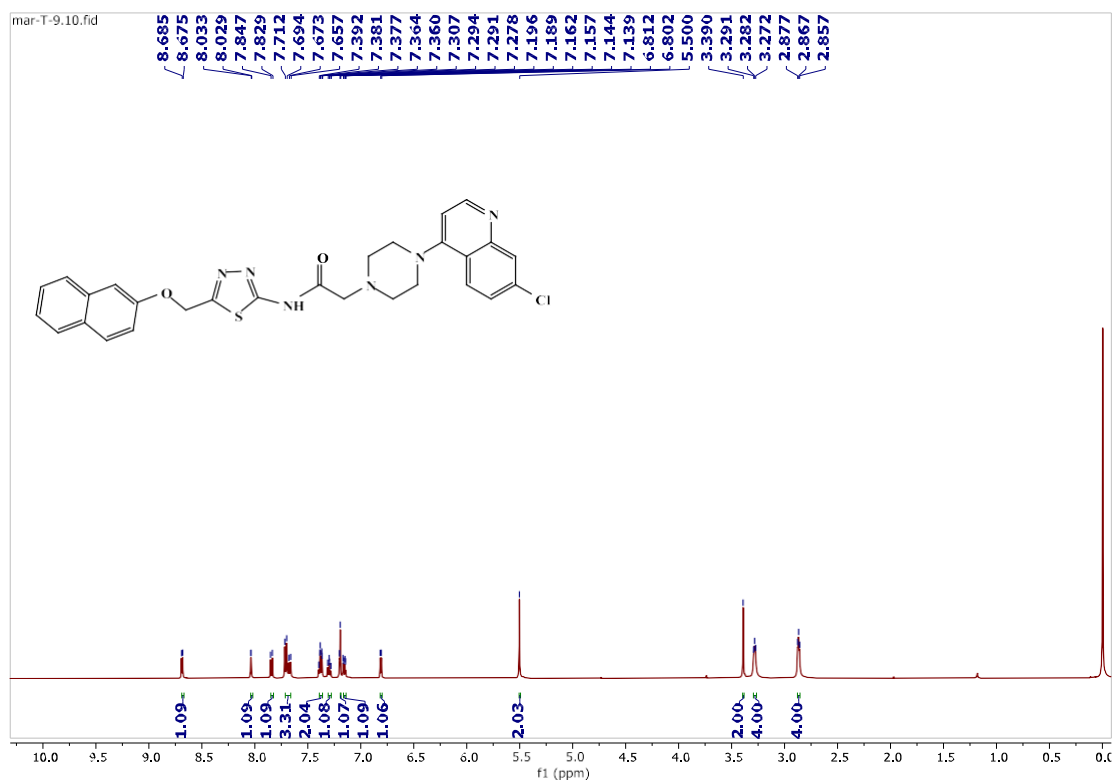

**Figure S22.** <sup>1</sup>H NMR spectra of compound T8 in CDCl<sub>3</sub>.

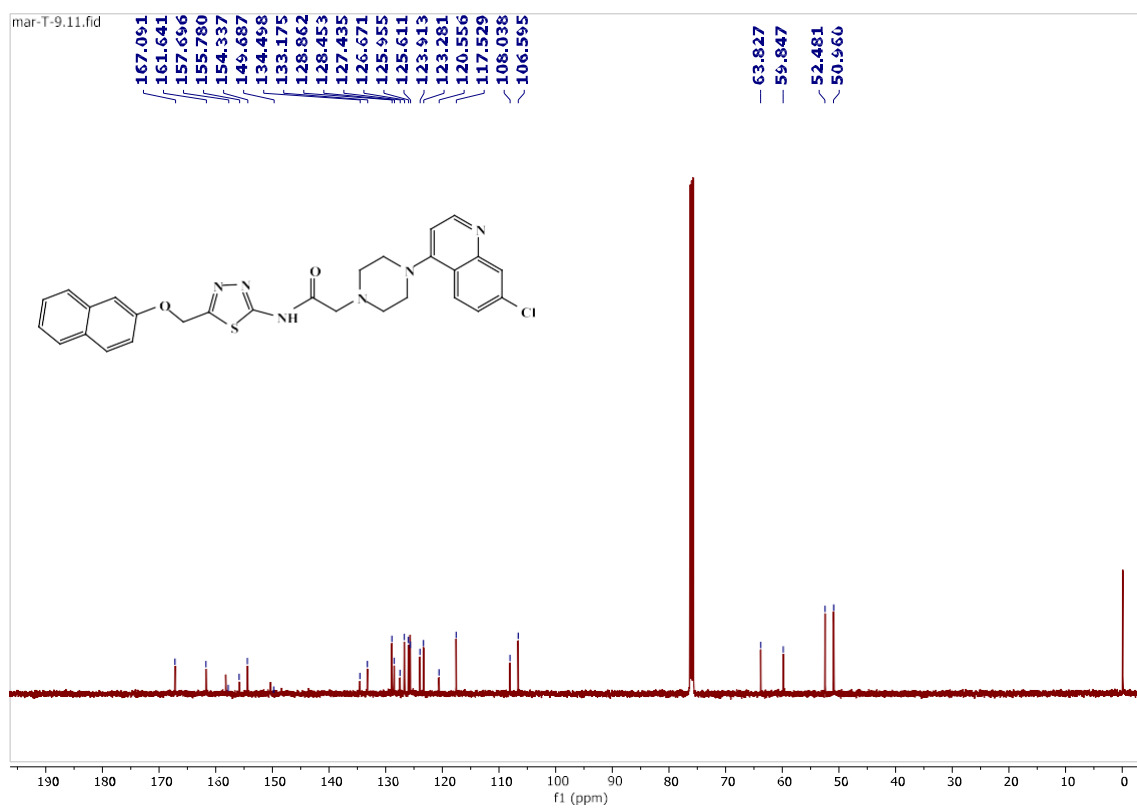

**Figure S23.**  $^{13}\text{C}$  NMR spectra of compound **T8** in  $\text{CDCl}_3$ .

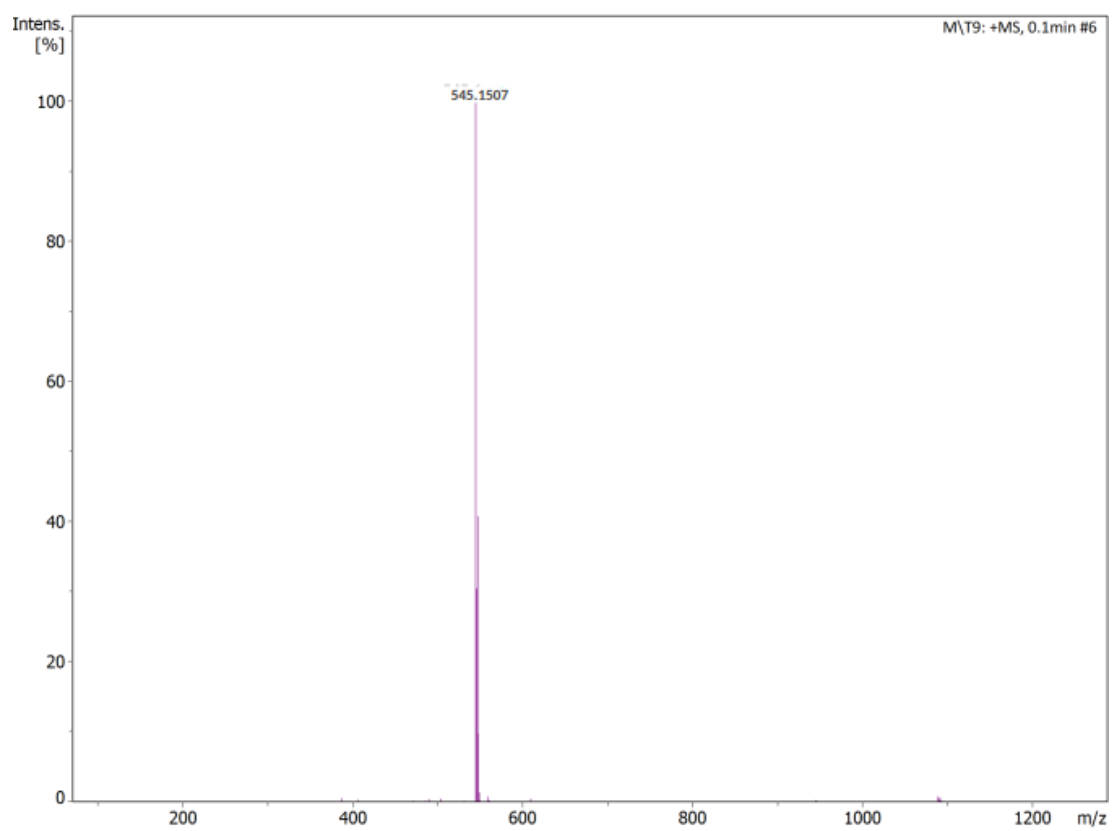

**Figure S24.** Mass spectra of compound **T8**

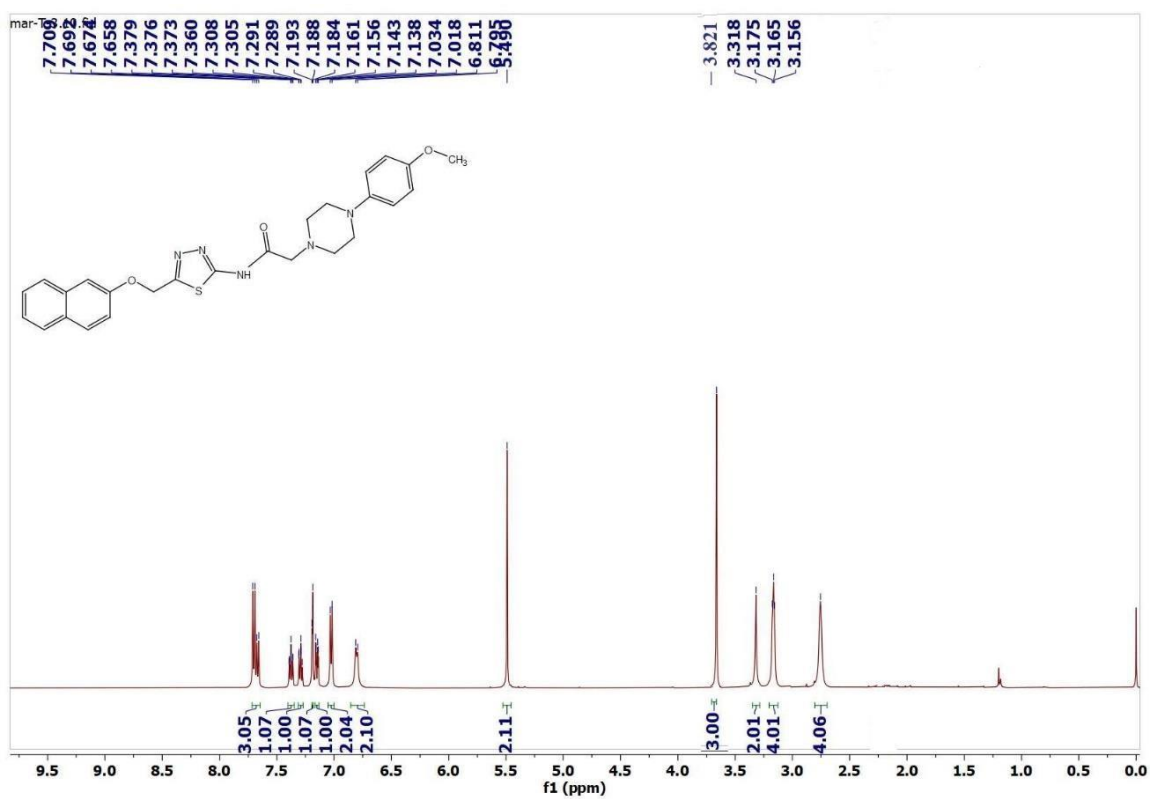

Figure S25. <sup>1</sup>H NMR spectra of compound T9 in CDCl<sub>3</sub>.

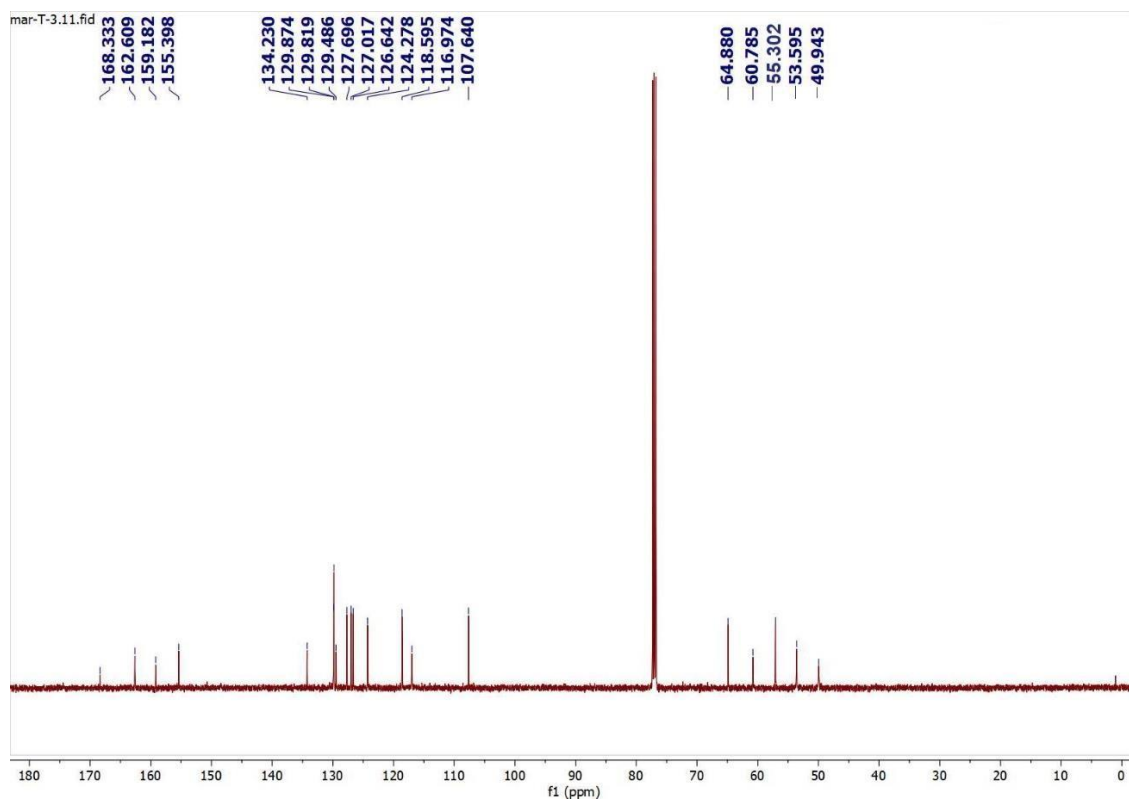

Figure S26. <sup>13</sup>C NMR spectra of compound T9 in CDCl<sub>3</sub>.



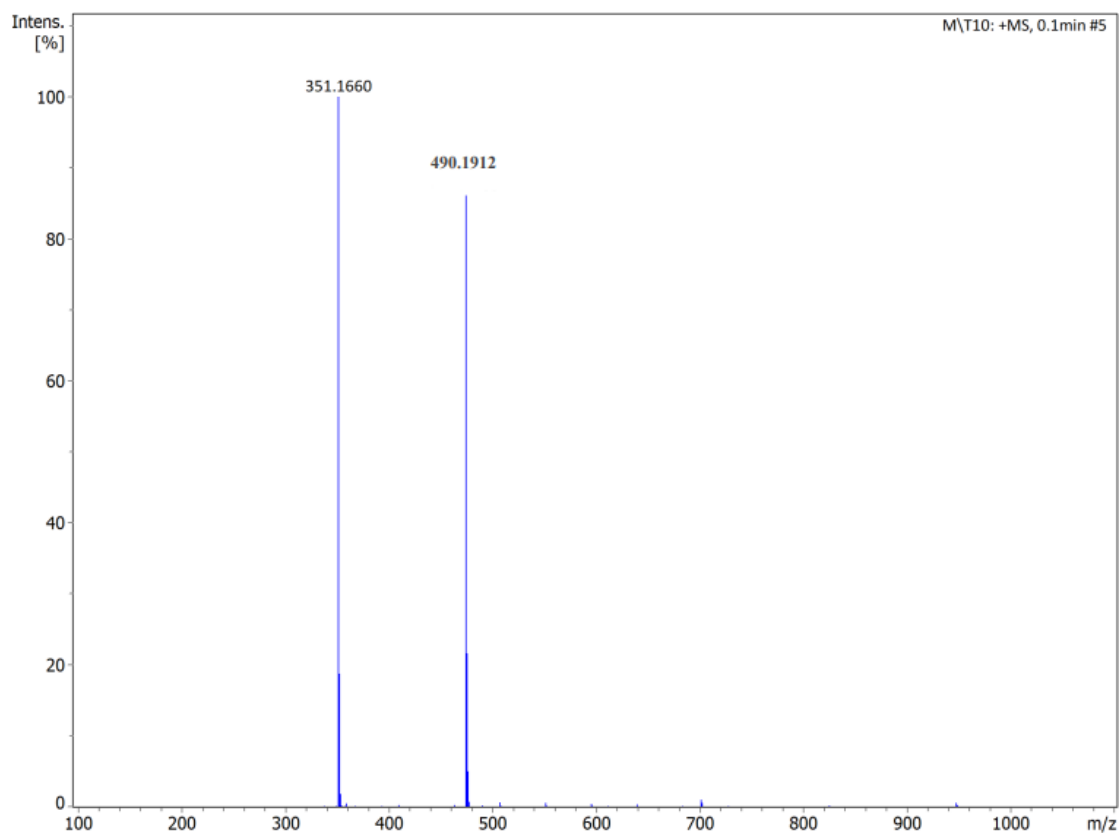

**Figure S27.** Mass spectra of compound T9

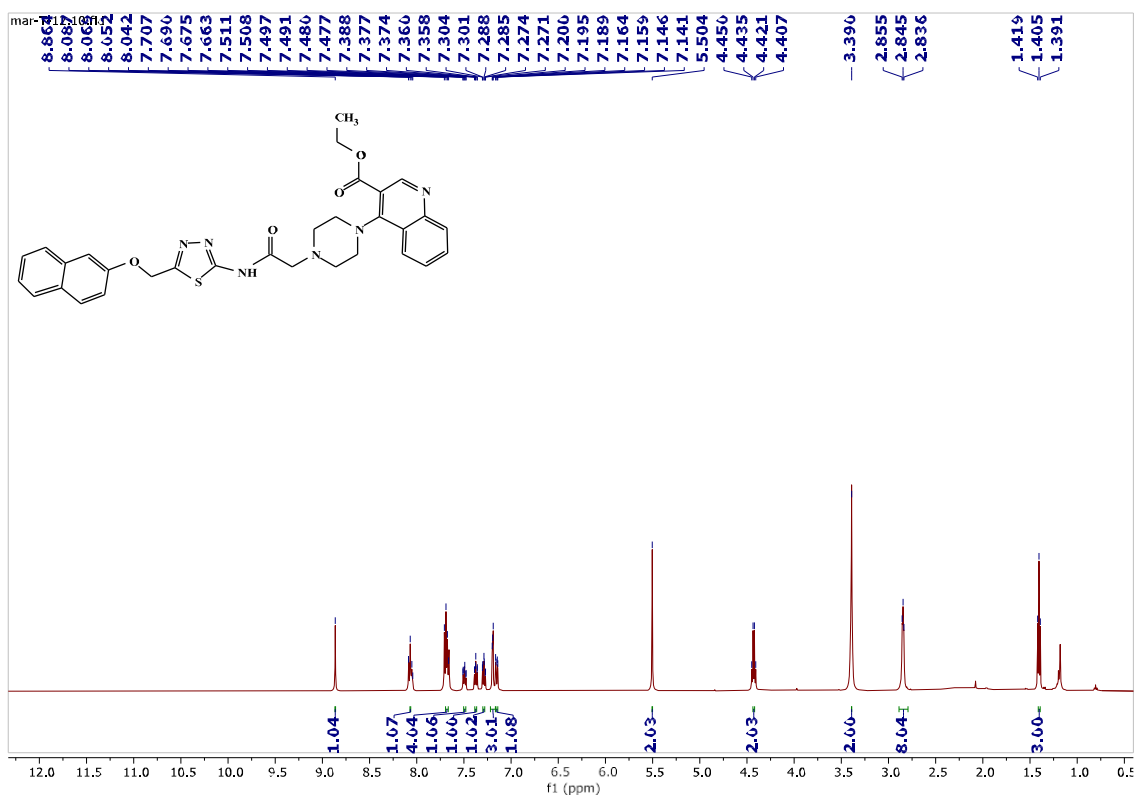

**Figure S28.** <sup>1</sup>H NMR spectra of compound T10 in CDCl<sub>3</sub>.

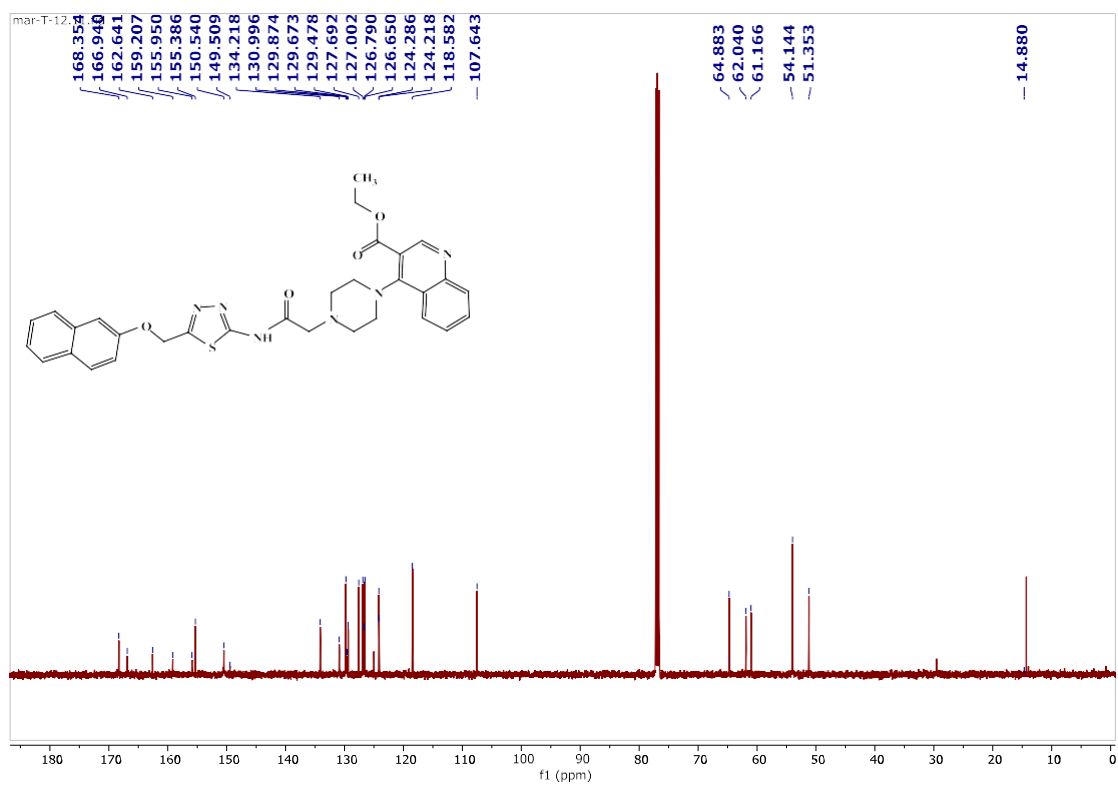

Figure S29. <sup>13</sup>C NMR spectra of compound T10 in CDCl<sub>3</sub>.

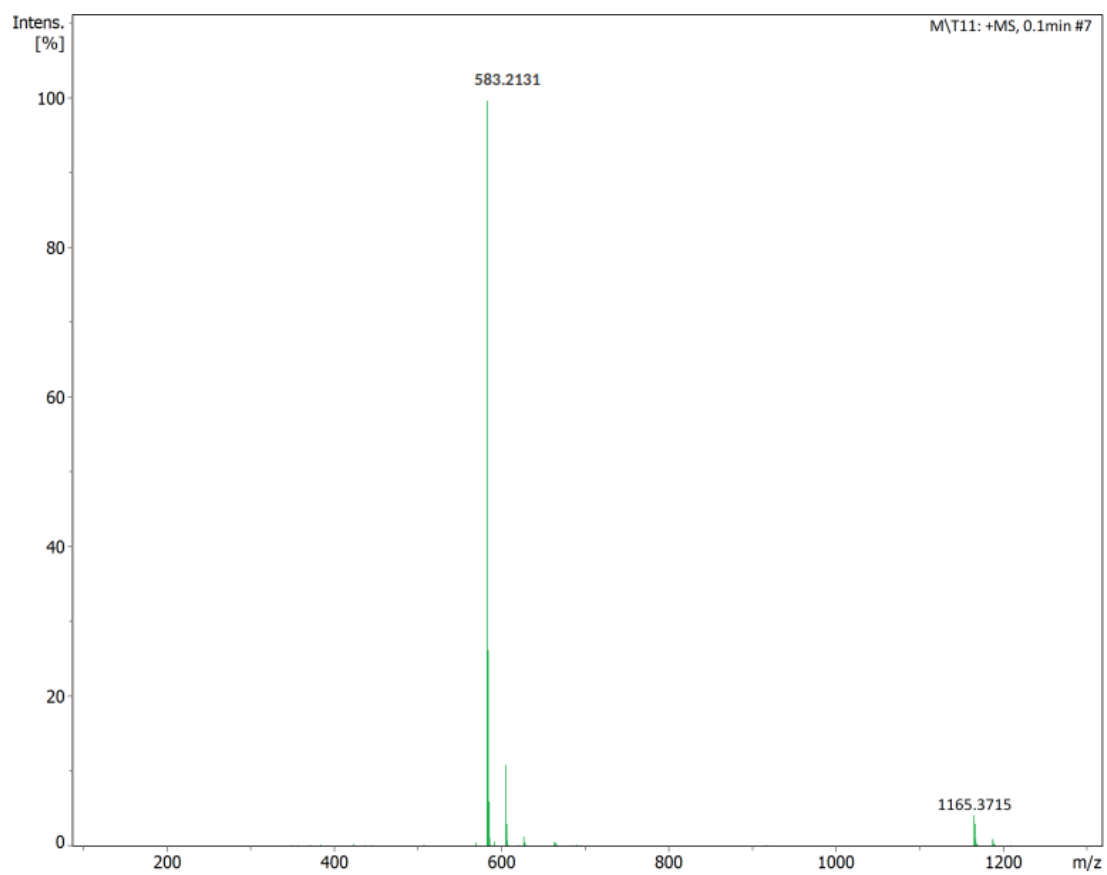

Figure S30. Mass spectra of compound T10
